# Supplementary material
Source: Frontiers journal article supplement (https://www.frontiersin.org/articles/491696)
Supplement: Data_Sheet_1.pdf [file Data_Sheet_1.pdf]

## Supplementary Materials

### 1 Plastic leakage to oceans

Total plastic leakage to the ocean was estimated at 15 million tonnes per year by compiling previously published sources and combining their estimates for individual contributions (Supplementary Table 1.1). Sources of ocean plastics included macroplastics (greater than 5 mm) from coastal and inland populations (including mismanaged plastic from imported waste streams); macroplastics from ocean-based sources (fisheries, shipping and aquaculture); and primary microplastics (smaller than 5 mm).

Our estimate of the total plastic load going to oceans is the highest ever published in the peer-reviewed literature (~15 million tonnes per year). Nonetheless, we believe this is still likely a conservative estimate, based on our own unpublished surveys in SE Asia as well as the age of some of the available data.

**Supplementary Table 1.1.** Estimated plastic leakage to oceans (tonnes per year)

| Source category                               | Total (t)         | Source                                                                                                                                                                          |
|-----------------------------------------------|-------------------|---------------------------------------------------------------------------------------------------------------------------------------------------------------------------------|
| Macroplastic leakage from coastal zones       | 8,762,950         | Jambeck et al (2015)                                                                                                                                                            |
| Macroplastic leakage from inland areas        | 1,200,000         | Lebreton et al (2017)                                                                                                                                                           |
| Macroplastic leakage from waste exports       | 804,473           | United Nations Commodity Trade Statistics Database (2018 data), Jambeck et al (2015) mismanagement and leakage rates                                                            |
| Macroplastic leakage from ocean-based sources | 2,737,000         | Lebreton et al (2018) based on data from Watson et al (2013), Bell et al (2017), Halpern et al (2008), FAO (2016), Ocean Conservancy (2011), Arcadis (2012) and Eunomia (2016). |
| Primary microplastics                         | 1,500,000         | Boucher & Friot (2017)                                                                                                                                                          |
| <b>Total</b>                                  | <b>15,004,423</b> | tonnes per year plastic leakage to the ocean                                                                                                                                    |

#### *Macroplastic leakage from coastal zones*

Rates of waste mismanagement for 192 coastal nations were modelled by Jambeck et al. (2015). Jambeck et al. applied these mismanagement rates to the estimated volume of plastic produced by populations living within 50 km of the coast to calculate the volume of mismanaged plastic in coastal zones. To calculate the amount of plastic entering oceans, they then assumed that between 15% (low) and 40% (high) of mismanaged plastic waste was leaking to oceans. We took the mid-point (27.5%) of this range as our estimated leakage rate to the ocean: applied to the mismanaged plastic waste volumes estimated for each country's

coastal population, provided in the supplementary materials of Jambeck et al. (2015), this yields an estimate of 8.76 million metric tonnes (Mt) of plastic per annum (range 4.78 - 12.75 Mt) entering oceans from coastal populations (Supplementary Table 1.2).

**Supplementary Table 1.2.** Estimated plastic leakage to oceans (tonnes per year) from coastal populations of the top 20 polluting countries, as ranked by Jambeck et al., 2015. Mid point assumes 27.5% of mismanaged plastic waste enters oceans, lower bound assumed 15%, upper bound assumes 40%.

| Country                       |               | Mid-Point (t)    | Lower bound (t)  | Higher bound (t)  |
|-------------------------------|---------------|------------------|------------------|-------------------|
| 1                             | China         | 2,425,422        | 1,322,958        | 3,527,887         |
| 2                             | Indonesia     | 884,635          | 482,528          | 1,286,742         |
| 3                             | Philippines   | 518,006          | 282,549          | 753,463           |
| 4                             | Vietnam       | 504,300          | 275,073          | 733,528           |
| 5                             | Sri Lanka     | 437,574          | 238,677          | 636,471           |
| 6                             | Thailand      | 282,628          | 154,161          | 411,096           |
| 7                             | Egypt         | 265,928          | 145,052          | 386,805           |
| 8                             | Malaysia      | 257,625          | 140,523          | 374,727           |
| 9                             | Nigeria       | 234,160          | 127,724          | 340,597           |
| 10                            | Bangladesh    | 216,515          | 118,099          | 314,931           |
| 11                            | South Africa  | 173,251          | 94,501           | 252,002           |
| 12                            | India         | 164,950          | 89,973           | 239,928           |
| 13                            | Algeria       | 143,153          | 78,083           | 208,222           |
| 14                            | Turkey        | 133,633          | 72,891           | 194,375           |
| 15                            | Pakistan      | 132,136          | 72,074           | 192,197           |
| 16                            | Brazil        | 129,636          | 70,711           | 188,562           |
| 17                            | Myanmar       | 126,024          | 68,740           | 183,308           |
| 18                            | Morocco       | 85,285           | 46,519           | 124,050           |
| 19                            | North Korea   | 83,690           | 45,649           | 121,731           |
| 20                            | United States | 75,742           | 41,314           | 110,170           |
| <b>Sum</b>                    |               | <b>7,274,294</b> | <b>3,967,797</b> | <b>3,967,797</b>  |
| <b>Sum of all 192 nations</b> |               | <b>8,762,950</b> | <b>4,779,791</b> | <b>12,746,109</b> |

#### *Macroplastic leakage from inland areas*

We used the Lebreton et al (2017) estimate of plastic inputs from inland areas (> 50km from coastline) to oceans. They estimated inland populations contributed between 0.79 and 1.52 Mt per year of plastic to oceans via river transport. We took the mid-point<sup>1</sup> calculated from the average of lower and upper range, 1.2 Mt per year.

---

<sup>1</sup> In the absence of information on the underlying distribution of source data published as ranges, we have assumed the midpoint as a proxy of median value.

### *Macroplastic leakage from waste exports*

Per capita generation of plastic waste is much larger in high-income countries. For example, OECD countries are estimated to generate an average of 2.2 kg per capita per day *versus* sub-Saharan Africa at an average of 0.65 kg per capita per day (Hoornweg and Bhada-Tata, 2012). High labour costs and low profitability from plastic recycling has driven the growth of plastic waste exports from high-income nations to low and middle-income nations whose recycling industries operate at lower cost (Brooks et al., 2018). However, less-developed waste management infrastructure in these destination countries results in higher waste mismanagement rates than in the wealthier source countries (Jambeck et al., 2015). The practice of exporting waste therefore potentially leads to additional plastic leakage to oceans through the mismanagement of plastic waste in destination countries, and likely exacerbates other harmful impacts resulting from, e.g., the uncontrolled burning of waste (GAIA, 2019).

We estimated the leakage of exported plastic waste to oceans using trade data (UN Trade Statistics) and Jambeck et al.'s estimates of waste mismanagement rates in destination countries (Jambeck et al. 2015). We extracted UN trade data for 2018 (imported and exported) under the commodity code 3915, "Waste, parings and scrap, of plastics"<sup>2</sup>. We based the analysis on records from 2018 as it is the only year of data available since the implementation of strict new waste import restrictions in China, historically the largest importer of plastic waste (Brooks et al., 2018). We extracted official trade records for plastic imports and exports by both reporter and partner trade nations. We compared the volume of plastic traded from paired reporter-partner reports and took the higher of the two reported figures to limit underreporting and fill gaps where only one nation reported trade data. We calculated that in 2018, for all records available for extraction on 26<sup>th</sup> July 2019, an estimated 9.4 Mt of plastic waste was traded globally.

For each plastic importing nation, we applied estimated rates of waste mismanagement from Jambeck et al. (2015) to their imported plastic waste volumes, then calculated potential leakage to oceans using the mid-point and range of leakage rates used above (27.5%; range 15% - 40%). Landlocked nations were assumed to have a leakage rate equal to zero. The estimated volume of plastic waste potentially leaking to oceans was summed for each exporting nation, based on the countries to which waste was sent, to estimate their contribution to ocean plastic pollution through exported waste. By summing these estimates across all exporting nations, our analysis reveals an additional 0.80 Mt of macroplastic (range 0.44-1.18 Mt) potentially entering oceans every year due to plastic waste export and mismanagement (Supplementary Table 1.3).

We recognise there is a fluid international policy situation as other nations join China in banning some traded waste, and the assumption that mismanagement rates of imported plastic waste is equal to that occurring within domestic waste management systems is unverified. Therefore, we consider these figures as indicative of the potential for mismanagement to occur and stress that further research is required to quantify plastic leakage to oceans via the waste trade.

---

<sup>2</sup> Available from: <https://www.taricsupport.com/nomenclatuur/3915000000.html>

**Supplementary Table 1.3.** Estimated plastic leakage to oceans (tonnes per year) from plastic exports for the top 20 countries as ranked by plastic mass exported (left) and leaked to oceans via exports (right). ‘Kg per capita’ columns show kg of exported plastic per capita (left) and kg of exported plastic per capita potentially leaking to oceans via waste exports (right). These estimations are based on data from UN trade statistics for the 2018 and Jambeck et al. (2015).

| Top 20 exporters                                                          |                       | Tonnes<br>(2018) | Kg<br>per<br>capita<br>(2018) | Top 20 polluters via leakage to<br>oceans from exported plastic<br>waste | Tonnes<br>(2018) | Kg<br>per<br>capita<br>(2018) |
|---------------------------------------------------------------------------|-----------------------|------------------|-------------------------------|--------------------------------------------------------------------------|------------------|-------------------------------|
| 1                                                                         | Germany               | 1,266,787        | 15                            | Japan                                                                    | 143,243          | 1.1                           |
| 2                                                                         | United States         | 1,217,145        | 4                             | United States                                                            | 142,360          | 0.4                           |
| 3                                                                         | Japan                 | 1,035,421        | 8                             | Germany                                                                  | 79,277           | 1.0                           |
| 4                                                                         | United Kingdom        | 756,106          | 11                            | United Kingdom                                                           | 63,514           | 0.9                           |
| 5                                                                         | France                | 441,705          | 7                             | China - Hong Kong SAR                                                    | 57,065           | 7.7                           |
| 6                                                                         | Netherlands           | 344,419          | 20                            | Thailand                                                                 | 28,415           | 0.4                           |
| 7                                                                         | Mexico                | 323,338          | 3                             | Marshall Islands <sup>3</sup>                                            | 20,562           | 352.0                         |
| 8                                                                         | China - Hong Kong SAR | 302,511          | 41                            | Australia                                                                | 19,818           | 0.8                           |
| 9                                                                         | Italy                 | 274,870          | 5                             | Spain                                                                    | 19,794           | 0.4                           |
| 10                                                                        | Poland                | 231,095          | 6                             | Netherlands                                                              | 18,973           | 1.1                           |
| 11                                                                        | Austria               | 206,644          | 23                            | Indonesia                                                                | 17,200           | 0.1                           |
| 12                                                                        | Canada                | 197,545          | 5                             | South Korea                                                              | 15,477           | 0.3                           |
| 13                                                                        | Thailand              | 196,463          | 3                             | Saudi Arabia                                                             | 12,665           | 0.4                           |
| 14                                                                        | Spain                 | 187,411          | 4                             | Canada                                                                   | 10,428           | 0.3                           |
| 15                                                                        | Slovenia              | 128,308          | 62                            | Mexico                                                                   | 10,354           | 0.1                           |
| 16                                                                        | Australia             | 127,381          | 5                             | Poland                                                                   | 9,798            | 0.3                           |
| 17                                                                        | Czech Rep.            | 121,512          | 11                            | China                                                                    | 9,304            | 0.0                           |
| 18                                                                        | Indonesia             | 106,576          | 0                             | Italy                                                                    | 9,286            | 0.2                           |
| 19                                                                        | Switzerland           | 99,412           | 12                            | France                                                                   | 8,961            | 0.1                           |
| 20                                                                        | Sweden                | 96,215           | 10                            | Philippines                                                              | 8,693            | 0.1                           |
| Global total traded                                                       |                       | 9,403,457        |                               | Global total leakage                                                     | 804,473          |                               |
| Total from the top 20                                                     |                       | 7,660,862        |                               | Total from the top 20                                                    | 705,187          |                               |
| Proportion of plastic waste<br>exports generated from top<br>20 exporters |                       | 81.5%            |                               | Estimated proportion of<br>plastic waste exports leaking<br>to oceans    | 8.6%             |                               |

<sup>3</sup> The per capita figure for the Marshall Islands is an outlier relative to larger countries due to the fact that their waste management, in common with most other small island nations, relies disproportionately on exports.

### *Macroplastic leakage from ocean-based sources*

We used the estimations for ocean-based sources of marine plastic pollution estimated by Lebreton et al (2018). We took the mid-point calculated from the average of lower and upper ranges for fishing, aquaculture and shipping as outlined in Supplementary Table 6 of Lebreton et al (2018) (Supplementary Table 1.4).

Plastic waste inputs from fishing were derived from fishing effort hotspots using data from Bell et al (2017) and Watson et al (2013). Estimates for aquaculture were derived from the UN FAO database for mariculture (ocean-based aquaculture; <http://www.fao.org/aquastat/en/>). Finally, estimates for shipping were estimated using gridded shipping frequency data from Halpern et al (2008). For further details on how these estimates were calculated, see the supplementary materials from Lebreton et al (2018)<sup>4</sup>.

**Supplementary Table 1.4.** Estimated plastic leakage to oceans (tonnes per year) from ocean-based sources, as estimated by Lebreton et al (2018).

| Sources      | Range               | Mid-point        |
|--------------|---------------------|------------------|
| Fishing      | 290,000 – 3,500,000 | 1,895,000        |
| Shipping     | 100,000 – 1,400,000 | 750,000          |
| Aquaculture  | 14,000 – 170,000    | 92,000           |
| <b>Total</b> |                     | <b>2,737,000</b> |

### *Primary microplastics*

While the degradation of macroplastics into fragments is the major source of ocean microplastics, primary microplastics – those directly released into the environment as particles smaller than 5 mm – represent an additional source of debris. Boucher and Friot (2017) estimated 1.5 Mt of microplastics (range 0.8 Mt – 2.5 Mt) entering oceans per year from the laundering of synthetic textiles, abrasion of car tyres, fallout of city dust, abrasion of road markings, release of marine coatings, microbeads from cosmetics, and spills of plastic pellets.

We used the reported per cent contributions to estimate the volume for each of the major source categories reported (Supplementary Table 1.5). For further details on how estimates were calculated, see the original report by Boucher & Friot (2017).

---

<sup>4</sup> Available from [https://static-content.springer.com/esm/art%3A10.1038%2Fs41598-018-22939-w/MediaObjects/41598\\_2018\\_22939\\_MOESM1\\_ESM.pdf](https://static-content.springer.com/esm/art%3A10.1038%2Fs41598-018-22939-w/MediaObjects/41598_2018_22939_MOESM1_ESM.pdf)

**Supplementary Table 1.5.** Primary microplastics leakage to oceans (tonnes per year), as estimated by Boucher & Friot (2017).

| Sources                              | %    | Total            |
|--------------------------------------|------|------------------|
| Laundering of synthetic textiles     | 35%  | 525,000          |
| Abrasion of car tyres                | 28%  | 420,000          |
| Fallout of city dust                 | 24%  | 360,000          |
| Abrasion of road markings            | 7%   | 105,000          |
| Release of marine coatings           | 3.7% | 55,500           |
| Release of microbeads from cosmetics | 2%   | 30,000           |
| Spills of plastic pellet             | 0.3% | 4,500            |
| <b>Total</b>                         |      | <b>1,500,000</b> |

## 2 Plastic pollution damage costs

To calculate the economic value of the damage caused to the environment from the plastics industry, we combined information from three sources; UNEP (2014), Beaumont et al. (2019) and Zheng and Suh (2019). While UNEP considered the decline in natural capital as a result of plastics across their life cycle, Beaumont et al. (2019) assessed the impact of ocean plastics on marine ecosystem services specifically and Zheng and Suh (2019) assessed the contribution to greenhouse gases. The latter two resources were considered more recent and comprehensive estimates of specific aspects of environmental damage and were therefore chosen to supersede the UNEP life cycle analysis in their respective categories. The UNEP breakdown of costs by commercial sector and cost category was applied *pro rata* to the other data to assign aggregate costs to particular product streams.

### *Land and water pollutants / Additives, Water use, Air pollutants and Land disamenity*

UNEP (2014) applied a natural capital approach to quantify the upstream (plastic inputs to manufacturing) and downstream (post manufacturing) impacts of plastic products across industries. We extracted the predicted contribution of natural capital costs from each sector from the figures provided in their Appendix 1: Sector Specific Results (UNEP, 2014, page 55-76) using a web based plot digitiser (<https://automeris.io/WebPlotDigitizer/>).

Attempts to quantify these upstream and downstream impacts are hindered by the absence of robust data across the complexity of global industries and the variable scales of environmental impacts. Therefore, where more comprehensive or recent damage estimates were available, we substituted these for the equivalent categories in UNEP (2014); ‘Marine Impacts’ was superseded by Beaumont et al.’s *Marine ecosystem services delivery* (2019); ‘Greenhouse gases’ was replaced by Zheng and Suh’s greenhouse gas analysis (2019); UNEP categories ‘Terrestrial pollutants to land and water’ and ‘Additives’ were summed for brevity; UNEP categories ‘Water use’, ‘Air pollutants’ and ‘Land disamenity’ were left unchanged.

### *Declining marine ecosystem services delivery*

After Beaumont et al (2019), we assume marine ecosystem services provided benefits to society approximating US\$ 49 trillion per year (Costanza et al., 2014). Following their estimates of a 1 - 5% decline in marine ecosystem service delivery due to the stock of marine plastics in 2011, this decline equals an estimated US\$ 500 - 2,500 billion annual loss. We take the mid-point estimate of their calculations to assume an annual loss worth US\$ 1.5 trillion. To allocate the cost of lost marine ecosystem services to different commercial sectors, the sectoral allocation of costs in the ‘maritime services’ category in the UNEP report was applied *pro rata* to the US\$ 1.5 trillion total (see below for UNEP data extraction methods).

### *Greenhouse gas contributions*

To estimate the environmental costs of greenhouse gases (GHG) emitted by the current plastics economy, we used published estimates of the total GHG emissions from the plastics industry and the estimated social costs of carbon. Zheng and Suh (2019) estimate that the entire lifecycle of conventional plastics generated an estimated 1.665 GtCO<sub>2</sub> of emissions in 2015, net of plastic recycling carbon credits (0.116 GtCO<sub>2</sub> in credits).

Ricke et al. (2018) estimate a global social cost of carbon of US\$ 417 per ton (median, range US\$ 177–805 per tCO<sub>2</sub>). By multiplying the emissions by the global social cost of carbon, we estimated the expected economic damage associated with greenhouse gas emissions from the plastics economy to be US\$ 694.3 billion in 2015 (Table 2.1). To allocate greenhouse gas emissions to different commercial sectors, the ratio of sectoral costs in the ‘greenhouse gas emissions’ category of the UNEP report (2014) was applied *pro rata* to the total social cost of carbon calculated above.

**Supplementary Table 2.1.** Estimated damage cost of plastic pollution broken down by industry sector (US\$ million per year).

| Sector                              | Total annual loss | Ocean damage                 | Greenhouse gases                                | Land pollutants    | Water use          | Air pollution      | Land disamenity    |
|-------------------------------------|-------------------|------------------------------|-------------------------------------------------|--------------------|--------------------|--------------------|--------------------|
| Food                                | 783,162           | 619,104                      | 157,179                                         | 5,304              | 1,050              | 303                | 222                |
| Soft drinks                         | 355,848           | 270,440                      | 81,845                                          | 2,767              | 548                | 152                | 96                 |
| Retail                              | 232,780           | 177,673                      | 52,828                                          | 1,769              | 348                | 99                 | 63                 |
| Non-durable household goods         | 190,021           | 121,462                      | 65,649                                          | 2,284              | 424                | 118                | 84                 |
| Personal products                   | 87,883            | 68,200                       | 18,869                                          | 631                | 125                | 35                 | 24                 |
| Clothing and accessories            | 98,981            | 58,176                       | 39,124                                          | 1,314              | 252                | 72                 | 43                 |
| Toys                                | 80,080            | 48,546                       | 30,182                                          | 1,065              | 195                | 56                 | 36                 |
| Footwear                            | 79,114            | 43,829                       | 33,839                                          | 1,133              | 217                | 64                 | 32                 |
| Restaurants                         | 51,769            | 42,060                       | 9,304                                           | 313                | 62                 | 17                 | 14                 |
| Tobacco                             | 27,856            | 22,209                       | 5,426                                           | 171                | 34                 | 9                  | 7                  |
| Athletic goods                      | 26,678            | 15,330                       | 10,871                                          | 377                | 69                 | 20                 | 11                 |
| Medical and pharmaceutical products | 16,717            | 12,775                       | 3,778                                           | 127                | 25                 | 7                  | 5                  |
| Consumer electronics                | 14,131            | 197                          | 13,323                                          | 487                | 86                 | 24                 | 15                 |
| Furniture                           | 69,097            | -                            | 66,151                                          | 2,345              | 415                | 118                | 68                 |
| Automobiles                         | 66,965            | -                            | 63,318                                          | 2,972              | 453                | 128                | 94                 |
| Durable household goods             | 44,698            | -                            | 42,620                                          | 1,653              | 281                | 83                 | 61                 |
| <b>Total</b>                        | <b>2,225,781</b>  | <b>1,500,000</b>             | <b>694,305</b>                                  | <b>24,712</b>      | <b>4,584</b>       | <b>1,305</b>       | <b>875</b>         |
| <i>Data Source</i>                  |                   | <i>Beaumont et al (2019)</i> | <i>Zheng and Suh (2018), Ricke et al (2019)</i> | <i>UNEP (2014)</i> | <i>UNEP (2014)</i> | <i>UNEP (2014)</i> | <i>UNEP (2014)</i> |



## References

- Arcadis (2012). Economic assessment of policy measures for the implementation of the marine 483 strategy framework directive. Brussels: Arcadis Belgium Available at: <https://ec.europa.eu/environment/enveco/water/pdf/report.pdf>.
- Beaumont, N. J., Aanesen, M., Austen, M. C., Börger, T., Clark, J. R., Cole, M., et al. (2019). Global ecological, social and economic impacts of marine plastic. *Marine Pollution Bulletin* 142, 189–195. doi:10.1016/j.marpolbul.2019.03.022.
- Bell, J. D., Watson, R. A., and Ye, Y. (2017). Global fishing capacity and fishing effort from 1950 to 2012. *Fish and Fisheries* 18, 489–505. doi:10.1111/faf.12187.
- Boucher, J., and Friot, D. (2017). Primary microplastics in the oceans: a global evaluation of sources. IUCN Available at: <https://portals.iucn.org/library/sites/library/files/documents/2017-002.pdf> [Accessed August 7, 2019].
- Brooks, A. L., Wang, S., and Jambeck, J. R. (2018). The Chinese import ban and its impact on global plastic waste trade. *Sci Adv* 4, eaat0131. doi:10.1126/sciadv.aat0131.
- Costanza, R., de Groot, R., Sutton, P., van der Ploeg, S., Anderson, S. J., Kubiszewski, I., et al. (2014). Changes in the global value of ecosystem services. *Global Environmental Change* 26, 152–158. doi:10.1016/j.gloenvcha.2014.04.002.
- Eunomia (2016). Study to support the development of measures to combat a range of marine litter sources Report for European Commission DG Environment. Available at: <https://ec.europa.eu/environment/marine/good-environmental-status/descriptor-10/pdf/MSFD%20Measures%20to%20Combat%20Marine%20Litter.pdf>.
- FAO (2016). AQUASTAT Main Database, Food and Agriculture Organization of the United Nations (FAO). Available at: <http://www.fao.org/aquastat/en/> [Accessed August 26, 2019].
- GAIA (2019). Discarded: Communities on the frontlines of the global plastic crisis. Berkeley, CA: Global Alliance for Incinerator Alternatives.
- Geyer, R., Jambeck, J. R., and Law, K. L. (2017). Production, use, and fate of all plastics ever made. *Sci Adv* 3, e1700782. doi:10.1126/sciadv.1700782.
- Halpern, B. S., Walbridge, S., Selkoe, K. A., Kappel, C. V., Micheli, F., D'Agrosa, C., et al. (2008). A Global Map of Human Impact on Marine Ecosystems. *Science* 319, 948. doi:10.1126/science.1149345.
- Hoornweg, D., and Bhada-Tata, P. (2012). What a Waste : A Global Review of Solid Waste Management. Washington, DC: World Bank Available at: <https://openknowledge.worldbank.org/handle/10986/17388>.
- Jambeck, J. R., Geyer, R., Wilcox, C., Siegler, T. R., Perryman, M., Andrady, A., et al. (2015). Plastic waste inputs from land into the ocean. *Science* 347, 768. doi:10.1126/science.1260352.

- Lebreton, L. C. M., van der Zwet, J., Damsteeg, J.-W., Slat, B., Andrady, A., and Reisser, J. (2017). River plastic emissions to the world's oceans. *Nature Communications* 8, 15611.
- Lebreton, L., Slat, B., Ferrari, F., Sainte-Rose, B., Aitken, J., Marthouse, R., et al. (2018). Evidence that the Great Pacific Garbage Patch is rapidly accumulating plastic. *Scientific Reports* 8, 4666. doi:10.1038/s41598-018-22939-w.
- Ocean Conservancy (2011). Tracking Trash: 25 Years of Action for the Ocean. Available at: [https://issuu.com/oceanconservancy/docs/marine\\_debris\\_2011\\_report\\_oc](https://issuu.com/oceanconservancy/docs/marine_debris_2011_report_oc).
- Ricke, K., Drouet, L., Caldeira, K., and Tavoni, M. (2018). Country-level social cost of carbon. *Nature Climate Change* 8, 895–900. doi:10.1038/s41558-018-0282-y.
- UN Trade Statistics UN Comtrade Database. *United Nations Commodity Trade Statistics Database*. Available at: <https://comtrade.un.org/db/default.aspx> [Accessed July 26, 2019].
- UNEP (2014). Valuing Plastics: The Business Case for Measuring, Managing and Disclosing Plastic Use in the Consumer Goods Industry. Division of Environmental Policy Implementation, United Nations Environment Programme Available at: <http://wedocs.unep.org/handle/20.500.11822/9238> [Accessed August 5, 2019].
- Watson, R. A., Cheung, W. W. L., Anticamara, J. A., Sumaila, R. U., Zeller, D., and Pauly, D. (2013). Global marine yield halved as fishing intensity redoubles. *Fish and Fisheries* 14, 493–503. doi:10.1111/j.1467-2979.2012.00483.x.
- Zheng, J., and Suh, S. (2019). Strategies to reduce the global carbon footprint of plastics. *Nature Climate Change* 9, 374–378. doi:10.1038/s41558-019-0459-z.
